# Supplementary material
Source: Elsevier journal article supplement (https://www.sciencedirect.com/science/article/pii/S0213911118302176)
Supplement: mmc1 [file S0213911118302176:mmc1.docx]

**Tabla I**

Variables de los índices de privación revisados

| **Dimensión** | **Variables** | **Índices de privacióna** | | | | | |
| --- | --- | --- | --- | --- | --- | --- | --- |
| **Townsend (UK, 1988)** | **Carstairs-Morris (UK, 1981,1991)** | **Jarman (UK, 1983)** | **IMD (UK, 2000)** | **MEDEA (España, 2008)** | **Lertxundi (Girona, 2005)** |
| Mercado de trabajo y clase social | Desocupación | X | X | X |  | X | X |
| Trabajadores eventuales |  |  |  |  | X |  |
| Prestaciones por desocupación e incapacidad |  |  |  | X |  |  |
| Clase social |  | X | X |  | X |  |
| Educación | Población con estudios secundarios |  |  |  |  |  | X |
| Población con instrucción insuficiente |  |  |  | X | X |  |
| Población con instrucción insuficiente en jóvenes |  |  |  | X | X |  |
| Puntuación académica en exámenes de nivel |  |  |  | X |  |  |
| Absentismo escolar |  |  |  | X |  |  |
| Condiciones de la vivienda | Sobreocupación (vivienda) | X | X | X | X |  |  |
| Tamaño de la vivienda |  |  |  |  |  | X |
| Viviendas por número de habitaciones |  |  |  |  |  | X |
| Viviendas con condiciones deficientesb |  |  |  | X |  |  |
| Viviendas sin calefacción |  |  |  | X |  |  |
| Renta | Renta bruta familiar disponible municipal |  |  |  |  |  | X |
| No vivienda de propiedad | X |  |  |  |  |  |
| Jóvenes que no pueden acceder a vivienda propia |  |  |  | X |  |  |
| No automóvil | X | X |  |  |  |  |
| Prestaciones por ingresos insuficientes |  |  |  | X |  |  |
| Prestaciones de alojamiento personas sin hogar |  |  |  | X |  |  |
| Cohesión social | Población extranjera |  |  | X |  |  | X |
| Población mayor que vive sola |  |  | X |  |  |  |
| Familias monoparentales |  |  | X |  |  |  |
| Menores de 5 años |  |  | X |  |  |  |
| Cambio de casa en el último año |  |  | X |  |  |  |

IMD: *Index of Multiple Deprivation;* MEDEA: Proyecto «Mortalidad en áreas pequeñas Españolas y Desigualdades socioeconómicas y Ambientales»; UK: United Kingdom.

aEl IMD también incluye indicadores de las dimensiones salud, geografía y ruralidad, violencia y entorno, que también han sido revisados, pero que no se han incluido en esta tabla porque no han sido considerados por ningún otro índice.

bSe considera que una vivienda presenta condiciones deficientes cuando no cumple con los requisitos del *Decent Homes standard* del Ministerio de Vivienda, Comunidades y Gobierno Local del Reino Unido. Estos requisitos incluyen las siguientes condiciones: condiciones salud y seguridad, condiciones de orden, modernización de cocina y baño, aislamiento acústico, tamaño de la vivienda, condiciones de los espacios comunitarios y confort térmico.
