# Supplementary material
Source: Elsevier journal article supplement (https://www.sciencedirect.com/science/article/pii/S0213911118302176)
Supplement: mmc2 [file S0213911118302176:mmc2.docx]

**Tabla II**

**Definición de las variables seleccionadas para la construcción del índice socioeconómico compuesto**

| **Variable** | **Numerador** | **Denominador** | **Fuente** | **Estandarizacióna** |
| --- | --- | --- | --- | --- |
| Población exenta de copago farmacéutico | Población de alta en el RCA durante el año de estudio de los grupos:  - Personas con pensiones no contributivas (y beneficiarios)  - Personas que han agotado el subsidio de desempleo (y beneficiarios)  - Personas que perciben una renta mínima de inserción (y beneficiarios)  - Personas que perciben una renta activa de inserción (y beneficiarios)  - Otros colectivos protegidos, como personas con patologías específicas (síndrome tóxico), discapacitados en programas específicos o menores tutelados (y beneficiarios) | Población de alta en el RCA durante el año de estudio | RCA 2015 | Grupos de edad: 0-4, 5-14, 15-44, 45-64, 65-74, 75-84 y más de 84 años |
| Población con renta inferior a 18.000 € | Población de alta en el RCA durante el año de estudio con ingresos declarados inferiores a 18.000 €, según la base liquidable de la declaración de IRPF (y beneficiarios). No incluye a las personas exentas de copago farmacéutico |
| Población con renta superior a 100.000 € | Población de alta en el RCA durante el año de estudio con ingresos declarados iguales o superiores a 100.000 €, según la base liquidable de la declaración de IRPF (y sus beneficiarios) |
| Población con ocupaciones manuales | Población de 25 a 64 años con ocupaciones manuales:  - Categoría 5: Trabajadores de servicios de restauración, personales, protección y vendedores  - Categoría 6: Trabajadores cualificados en actividades agrícolas, ganaderas, forestales y pesqueras  - Categoría 7: Artesanos y trabajadores cualificados de las industrias manufactureras y de la construcción  - Categoría 8: Operadores de instalaciones y maquinaria y montadores  - Categoría 9: Trabajadores no cualificados | Población ocupada de 25 a 64 años. Se considera que una persona es ocupada si aparece en el registro de afiliados a la Seguridad Social | REP 2014 | Grupos de edad: 25-44 y 45-64 años |
| Población no ocupada | Población no ocupada de 25 a 64 años. Se considera que una persona es ocupada si aparece en el registro de afiliados a la Seguridad Social. La población no ocupada incluye la población desempleada y la inactiva | Población de 25 a 64 años |
| Población con nivel de instrucción insuficiente | Población mayor de 16 a 74 años que no sabe leer o escribir, o tiene estudios primarios (niveles 0 y 1 de la clasificación CCED-2014 (A)) | Población de 16-74 años | Grupos de edad: 16-44, 45-64 y 65-74 años |
| Población sin estudios secundarios posobligatorios | Población de 25 a 74 años que no sabe leer o escribir, tiene estudios primarios o de la primera etapa de educación secundaria (niveles 0, 1 y 2 de la clasificación CCED-2014 (A)) | Población de 25-74 años | Grupos de edad: 25-44, 45-64 y 65-74 años |
| Población con nacionalidad de un país en vías de desarrollo | Población con nacionalidad de un país en vías de desarrollo, según la clasificación Idescat | Población total | Grupos de edad: 0-14, 15-44, 45-64 y más de 64 años |
| Población mayor de 64 años en hogares unipersonales | Población mayor de 64 años que vive en núcleos familiares unipersonales | Población mayor de 64 años | Grupos de edad: 65-74 y más de 75 años |
| Mortalidad anterior a los 75 años | Número de defunciones de personas menores de 75 años | Población menor de 75 años | RMC 2011-2013 | Grupos de edad: 0-4, 5-14, 15-44, 45-64 y 65-74 años |
| Hospitalizaciones potencialmente evitables | Número de hospitalizaciones potencialmente evitables por EPOC, insuficiencia cardiaca y complicaciones de la diabetes | Población mayor de 19 años | CMBD-HA 2015 | Grupos de edad: 20-44, 45-64, 65-74, 75-84 y más de 84 años |

CCED: Clasificación Catalana de Educación; CMBD-HA: Conjunto Mínimo Básico de Datos de Atención Hospitalaria; EPOC: enfermedad pulmonar obstructiva crónica; IRPF: Impuesto sobre la Renta de las Personas Físicas; ISC: índice socioeconómico compuesto; RCA: Registro Central de Asegurados; REP: Registro Estadístico de Población; RMC: Registro de Mortalidad de Cataluña.

aEstandarización por edad y sexo. Método indirecto (regresión de Poisson).
